# Supplementary material
Source: PubMed Central journal article supplement (PMC8619653)

## Electronic Supplementary Material

**Supplementary Table 1** Summary of lymphoma types (safety analysis set)

|                                                  | Patients with malignant lymphoma<br>( <i>N</i> = 51) |
|--------------------------------------------------|------------------------------------------------------|
| PCNSL                                            | 25                                                   |
| DLBCL <sup>a</sup>                               | 20                                                   |
| IVLBCL                                           | 2                                                    |
| Primary intraocular lymphoma <sup>b</sup>        | 2                                                    |
| ALCL, ALK negative                               | 1                                                    |
| High grade BCL, with BCL2 and MYC rearrangements | 1                                                    |

Number of patients (%) are shown

<sup>a</sup>Location was not reported, except for two patients with primary right breast lesions. One additional patient was reported as ‘DLBCL, non-germinal center B-cell like’. <sup>b</sup>One patient had CNS relapse.

*ALCL* anaplastic large cell lymphoma, *ALK* anaplastic lymphoma kinase, *BCL* B-cell lymphoma; *CNS* central nervous system, *DLBCL* diffuse large B-cell lymphoma, *IVLBCL* intravascular large B-cell lymphoma, *PCNSL* primary central nervous system lymphoma

**Supplementary Fig. 1** Kaplan-Meier analysis of survival after autologous HSCT

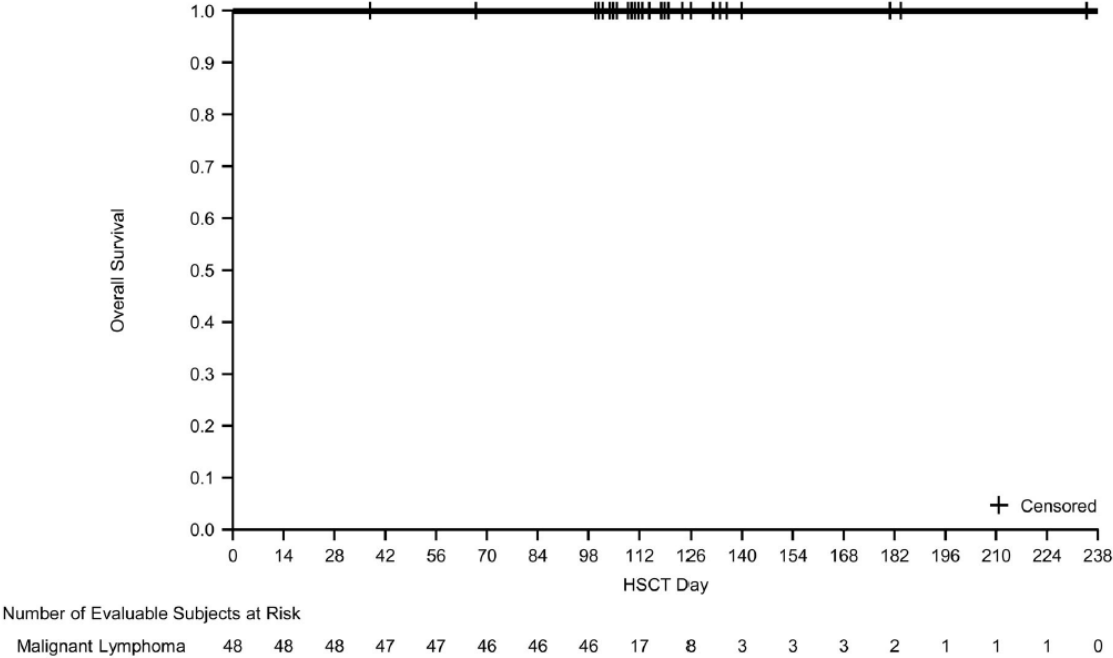

Supplement: 12185_2021_3263_MOESM2_ESM.pdf [file 12185_2021_3263_MOESM2_ESM.pdf]
